# Supplementary material for: The dissolution of carbon nanotubes in aniline, revisitedElectronic Supplementary Information (ESI) available: additional TEM pictures of aniline treated MWNTs and SEM of the PTFE membranes used in the work. See http://www.rsc.org/suppdata/jm/b4/b403509g/
Source: Royal Society of Chemistry journal article supplement (doi:10.1039/b403509g), 2004-01-01
Supplement: b403509g.pdf [file b403509g.pdf]

**Supporting Information** to the paper by D. F. Perepichka, F. Wudl, S. R. Wilson, Y. Sun and D. I. Schuster, “*The Dissolution of Carbon Nanotubes in Aniline, Revisited*”

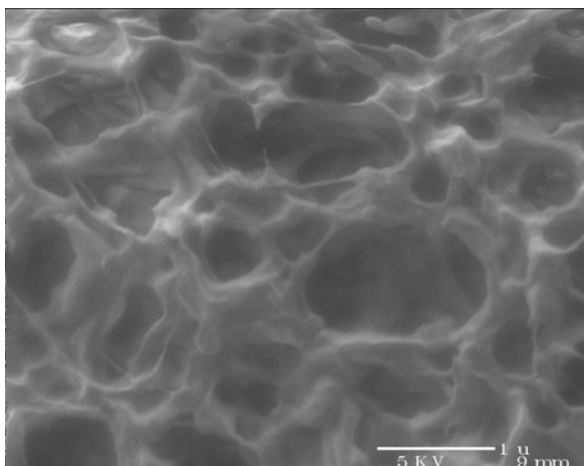

**Figure S1.** SEM image of PTFE membranes used for filtration of the SNWT-aniline solution.

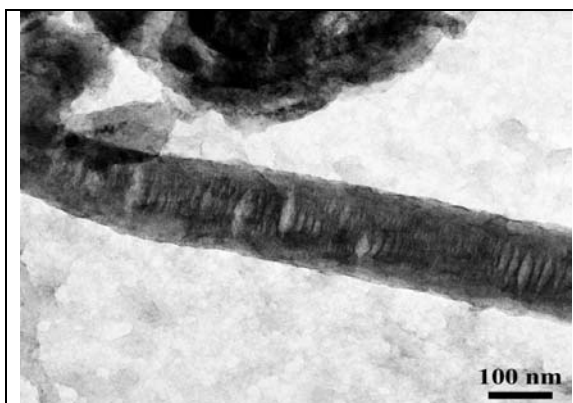

**Figure S2.** TEM image for an individual aniline treated MWNT.

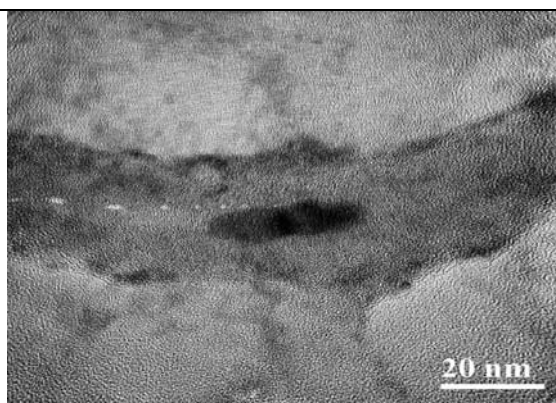

**Figure S3.** High magnification TEM image for an individual aniline treated MWNT showing the nanoparticle inside the tube.
